# Supplementary material for: The sugar‐responsive circadian clock regulator bZIP63 modulates plant growth
Source: PubMed Central journal article supplement (PMC9292441; doi:10.1111/nph.17518), 2021-06-30
Supplement: NPH-231-1875-s001.pdf [file NPH-231-1875-s001.pdf]

## ***New Phytologist* Supporting Information**

Article title: **The sugar-responsive circadian clock regulator bZIP63 modulates plant growth**

Authors: Américo J. C. Viana<sup>1,\*</sup>, Cleverson C. Matioli<sup>1,\*</sup>, David W. Newman<sup>1</sup>, João G. P. Vieira<sup>1</sup>, Gustavo T. Duarte<sup>1</sup>, Marina C. M. Martins<sup>2,5</sup>, Elodie Gilbault<sup>3</sup>, Carlos T. Hotta<sup>4</sup>, Camila Caldana<sup>2,6</sup>, Michel Vincentz<sup>1</sup>.

<sup>1</sup>Centro de Biologia Molecular e Engenharia Genética, Departamento de Biologia Vegetal, Instituto de Biologia, Universidade Estadual de Campinas, CEP 13083-875, CP 6010, Campinas, São Paulo, Brazil. <sup>2</sup>Brazilian Bioethanol Science and Technology Laboratory (CTBE/CNPEN), Rua Giuseppe Máximo Scolfaro 10000, 13083-970, Campinas, Brazil. Max-Planck Partner Group, Brazilian Bioethanol Science and Technology Laboratory (CTBE/CNPEN), Campinas, Brazil. <sup>3</sup>Institut Jean-Pierre Bourgin, INRA, AgroParisTech, CNRS, Université Paris-Saclay, 78000, Versailles, France. <sup>4</sup>Departamento de Bioquímica, Instituto de Química, Universidade de São Paulo, CEP 05508-000, São Paulo, SP, Brazil. <sup>5</sup>Laboratory of Plant Physiological Ecology, Department of Botany, Institute of Biosciences, University of São Paulo, CEP 05508-090, São Paulo, Brazil. <sup>6</sup>Max Planck Institute of Molecular Plant Physiology, Am Mühlenberg 1, 14476, Potsdam, Golm, Germany.

Author for correspondence: Michel Vincentz, Tel: +55 (19) 3521-1140

Email: mgavince@unicamp.br

\*These authors contributed equally to this work.

Article acceptance date: 18 May 2021.

The following Supporting Information is available for this article:

**Fig. S1** Characterization of *bZIP63* mutants.

**Fig. S2** *bzip63-2* mutant has a reduced leaf area and growth rate.

**Fig. S3** bZIP63 binds to energy stress responsive genes.

**Fig. S4** *bzip63-2* starch degradation pattern under short days.

**Fig. S5** Circadian phase of KIN10-induced energy-stress responsive genes.

**Fig. S6** Starch availability in short day versus 12-12 photoperiods.

**Fig. S7** bZIP63 binds to cell wall modification gene.

**Table S1** Up and Down-regulated genes in *bzip63-2* plants compared with the WT.

**Table S2** Genes related to circadian clock, starch degradation and energy stress deregulated in *bZIP63* mutants.

**Table S3** Relative metabolite content at EN in leaves of *bzip63-2* as compared to Ws.

**Table S4** List of primers used for quantification of the mRNA levels and the immunoprecipitated sequences by RT-qPCR.

**Table S5** Circadian parameters calculated from two 24 h cycles under free-running conditions.

**Table S6** Circadian oscillator binding in downregulated genes in *bzip63-2* that are induced by KIN10 overexpression.

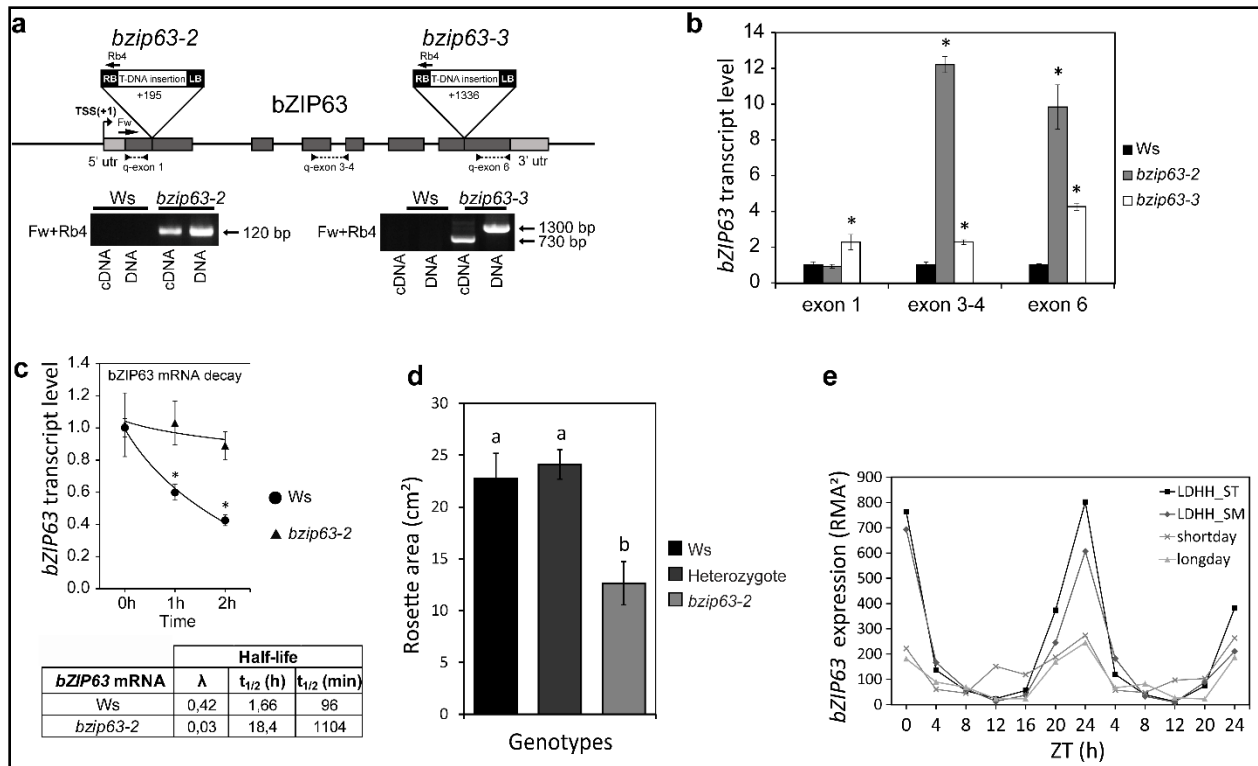

**Fig. S1 Characterization of *bZIP63* mutants.** (a) Schematic representation of *bZIP63* gene structure depicting the T-DNA insertion location in *bzip63-2* (FLAG\_610A08) and *bzip63-3* (FLAG\_532A10) mutants. T-DNA insertion and chimeric transcripts were verified by end-point PCR using genomic DNA and cDNA from wild type *Ws* and mutants *bzip63-2* and *bzip63-3*; arrows indicate end-point PCR primers (Fw: forward primer and Rb4: T-DNA right border primer; Table S4) and horizontal dashed lines indicate the positions of the RT-qPCR products shown in (b). The precise T-DNA insertion location was obtained by sequencing of the amplicons from genomic DNA. (b) In both *bzip63-2* and *-3* mutants *bZIP63* mRNA fragments were overrepresented downstream the T-DNA insertion compared to those detected upstream (two-tailed Student's *t*-test;  $n = 9$ ;  $*P < 0.05$ ). Values are means, and error bars indicate standard deviation. (c) Kinetics of *bZIP63* transcript decay in *Ws* and *bzip63-2* after treatment with the transcription inhibitor cordycepin. Plant growth, treatments and half-life calculation of *bZIP63* transcript were done as previously described (Matiolli *et al.*, 2011). The x-axis represents the elapsed time after treatment with cordycepin. The data were obtained from 3 biological replicates and each replicate consisted of the whole rosette collected from three plants (two-tailed Student's *t*-test;  $n = 9$ ;  $*P < 0.05$ ). Values are means, and error bars indicate standard deviation. Based on data from inhibited transcription, the increase of *bZIP63* transcript levels in mutants *bzip63-2/-3*

is probably a consequence of an alteration in post-transcriptional regulation, resulting in greater bZIP63 transcript stability in these mutants. Gene expression data suggest that the bZIP63 chimeric transcript in these mutants is recognized as aberrant and is not translated or produces a non-functional protein, since the bZIP63 target genes *ASN1*, *DIN10* and *SEN1* (*Senescence-Associated Protein 1*) involved in the response to energy stress are downregulated in *bzip63-2/-3* just as in *bzip63-1* (Matiolli et al., 2011) and *bzip63* (Mair et al., 2015), a leaky and a knockout T-DNA insertion mutant, respectively. Several studies have reported increased levels of transcripts downstream and/or upstream of T-DNA insertion in Arabidopsis (Bertrand *et al.*, 2005; Xu *et al.*, 2007; Fojtová *et al.*, 2011), however, in cases where the T-DNA insertion is in the exon, the chimeric transcripts were not translated or the proteins were non-functional (Wang *et al.*, 2008).

(d) Complementation of *bzip63-2* mutant by backcrossing with Ws, showing that a single functional *bZIP63* allele can restore *bzip63-2* rosette growth rates to those observed in Ws. The data were obtained from 30 biological replicates, differences were tested performing ANOVA and the different letters indicate statistically significant difference (Tukey's HSD test,  $P < 0.05$ ). Values are means, and error bars indicate standard deviation. (e) Diurnal rhythmic accumulation of *bZIP63* transcript (data source: <http://diurnal.mocklerlab.org>). LDHH\_SM and LDHH\_ST represent Arabidopsis Columbia-0 plants with 29 and 35 days old, respectively, grown in soil under equinoctial conditions (12 h light / 12 h dark). Longday (16 h light / 8 h dark) and shortday (8 h light / 16 h dark) stands for 7 days old Arabidopsis Columbia-0 seedlings, grown in MS (Murashige-Skoog medium supplemented with 3% sucrose).

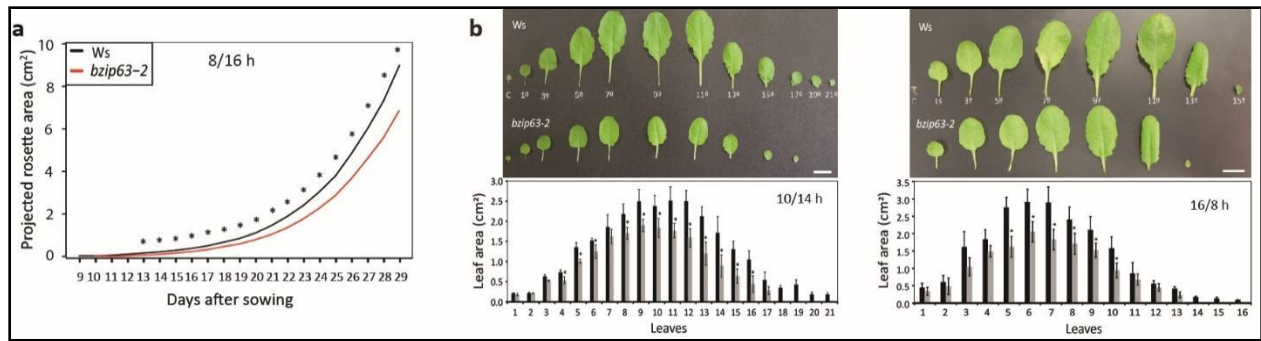

**Fig. S2 *bzip63-2* mutant has a reduced leaf area and growth rate.** (a) Daily records of *bzip63-2* and Ws rosette areas up to 29 days after sowing plants using the Phenoscope automated phenotyping system (<https://phenoscope.versailles.inra.fr/>; Tisné *et al.*, 2013), the impaired growth of *bzip63-2* was observed as early as 13 days after sowing. The data for each time point are means obtained from 14 and 8 biological replicates for Ws and *bzip63-2*, respectively. (b) The *bzip63-2* mutant has reduced leaf growth and development when grown in both short and long days photoperiod. In 30-day-old plants (stage of development 3.90; Boyes *et al.*, 2001) the leaf area of the *bzip63-2* mutant was nearly 30% and 20% smaller than Ws, whilst the leaves number were 17 and 13 for *bzip63-2* and 21 and 16 for Ws when grown in under short- and long-day photoperiod, respectively. The picture shows the odd numbered leaves. Asterisks denote a significant difference between the means using Student's t-test ( $*P < 0.05$ ). Values are means, and error bars indicate standard deviation. Bars, 1 cm.

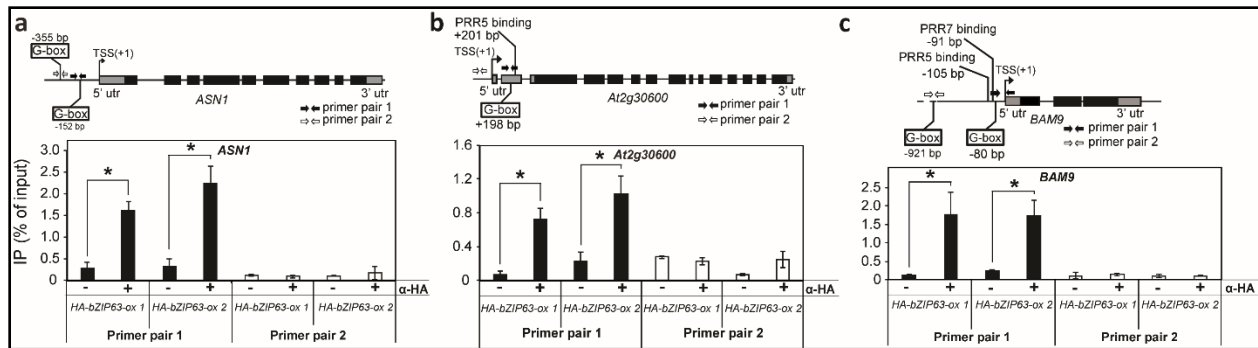

**Fig. S3 bZIP63 binds to energy stress responsive genes.** Enrichment of specific bZIP63-bound cis regulatory regions of genes related to energy stress responses in two independent transgenic lines: *HA-bZIP63-ox1* in *bzip63-2* background, and *HA-bZIP63-ox2* in *Ws* background. bZIP63 binding to (a) *ASN1*, (b) *AT2G30600* and (c) *BAM9* cis regulatory sequences were assessed by ChIP (Chromatin Immunoprecipitation) using anti-HA antibody followed by qPCR. The schemes of gene structure depict the binding sites of the circadian clock transcriptional regulators PRR7 and PRR5, as well as the bZIP63 binding region containing canonical G-box motifs. The numbers indicate the position of binding sites and motifs relative to the transcription start site (TSS+1) according to TAIR10 ([www.arabidopsis.org](http://www.arabidopsis.org)). For ChIP-qPCR assays, shoot samples of 12-day old *HA-bZIP63-ox1* and *HA-bZIP63-ox2* plants were harvested at the end of the night (EN). Primer pair 1 amplifies the promoter region containing the closer G-box motif relative to the TSS+1, while primer pair 2 amplifies a region containing the second closer G-box motif of TSS+1 or without G-box or any putative bZIP binding site. - indicates mock and + indicates immunoprecipitated samples. Data were obtained from three independent experiments for *HA-bZIP63-ox1* and six for *HA-bZIP63-ox2* (Student's *t*-test; \**P* < 0.05). Values are means, and error bars indicate standard deviation.

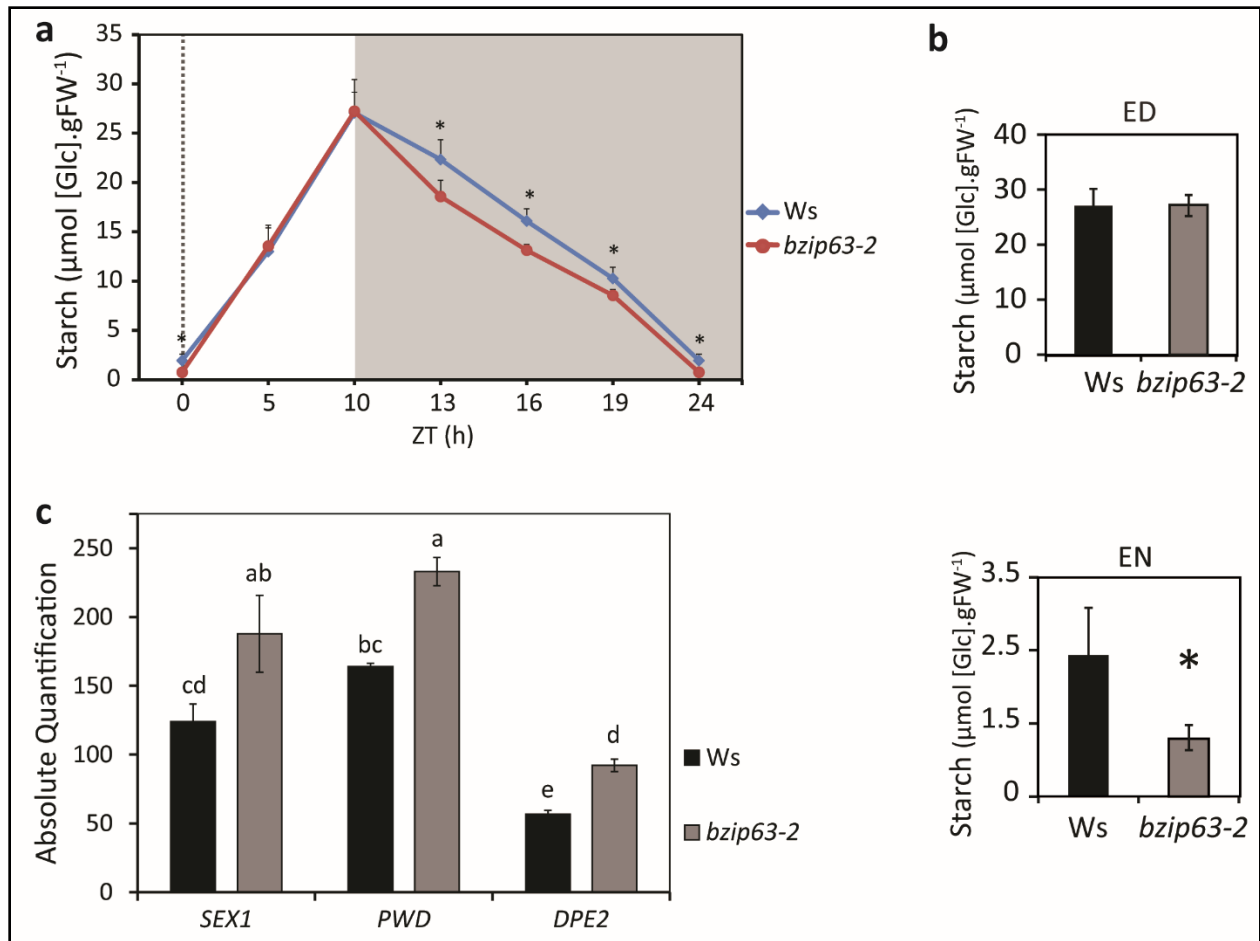

**Fig. S4 *bzip63-2* starch degradation pattern under short days.** (a) Time course analysis of starch levels in *bzip63-2* and Ws leaves through the diel cycle under SD conditions. Values are means, and error bars indicate standard deviation. (b) Starch levels at the end of the day (ED; ZT = 10 h) and EN (ZT = 24 h) in leaves of *bzip63-2* as compared to Ws. The average amount of starch for each time point was measured from five biological replicates, and each replicate consisted of leaves collected from six 30-day old plants (Student's *t*-test;  $n = 30$ ;  $*P < 0.05$ ). Values are means, and error bars indicate standard deviation. (c) The absolute transcript levels of starch degradation-related genes *SEX1*, *PWD* and *DPE2*, are higher in *bzip63-2* at EN under SD conditions. Data were obtained from one experiment with three biological replicates, and each replicate consisted of four youngest leaves and the shoot apical meristems collected from five 25-day old plants. Values are means, and error bars indicate standard deviation ( $n = 6$ ), differences were tested performing ANOVA and the different letters indicate groups that are significantly different (Tukey's HSD test,  $P < 0.05$ ).

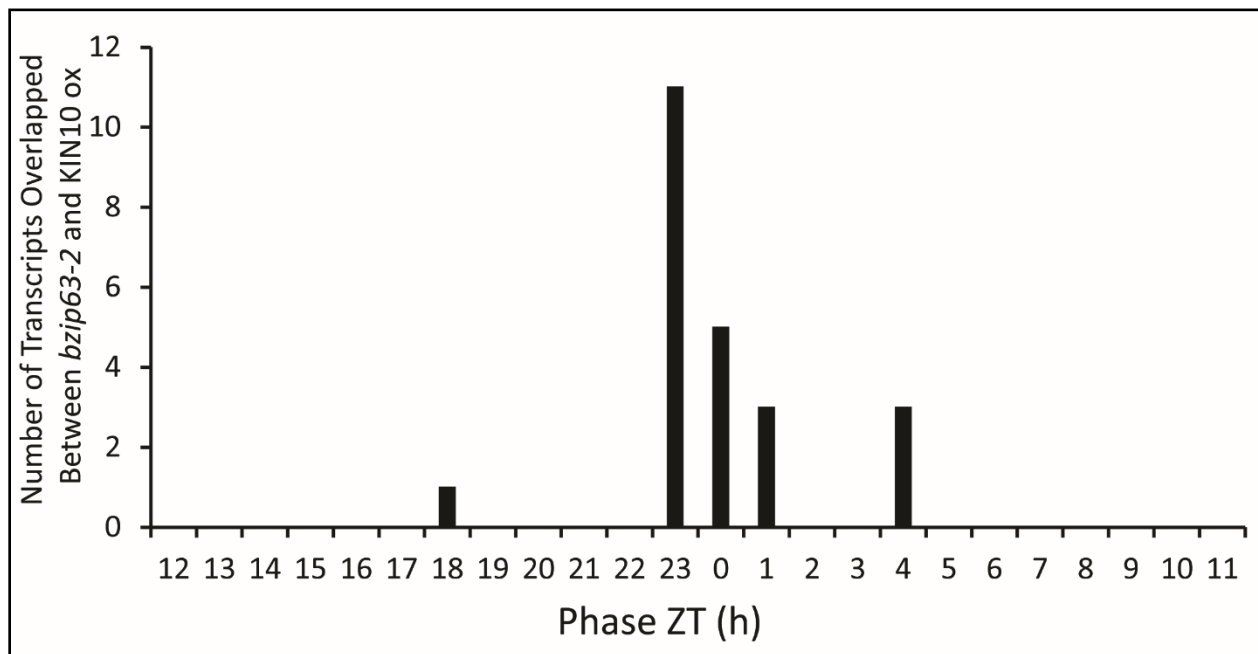

**Fig. S5 Circadian phase of KIN10-induced energy-stress responsive genes.** Circadian phase of the 27 downregulated genes in *bzip63-2* mutant that overlap with genes induced by KIN10 overexpression and oscillate under entrainment conditions. An enrichment of genes oscillating with the same phase as *bZIP63* (ZT 23h) was observed. Circadian phase data was obtained from DIURNAL Database (<http://diurnal.mocklerlab.org>).



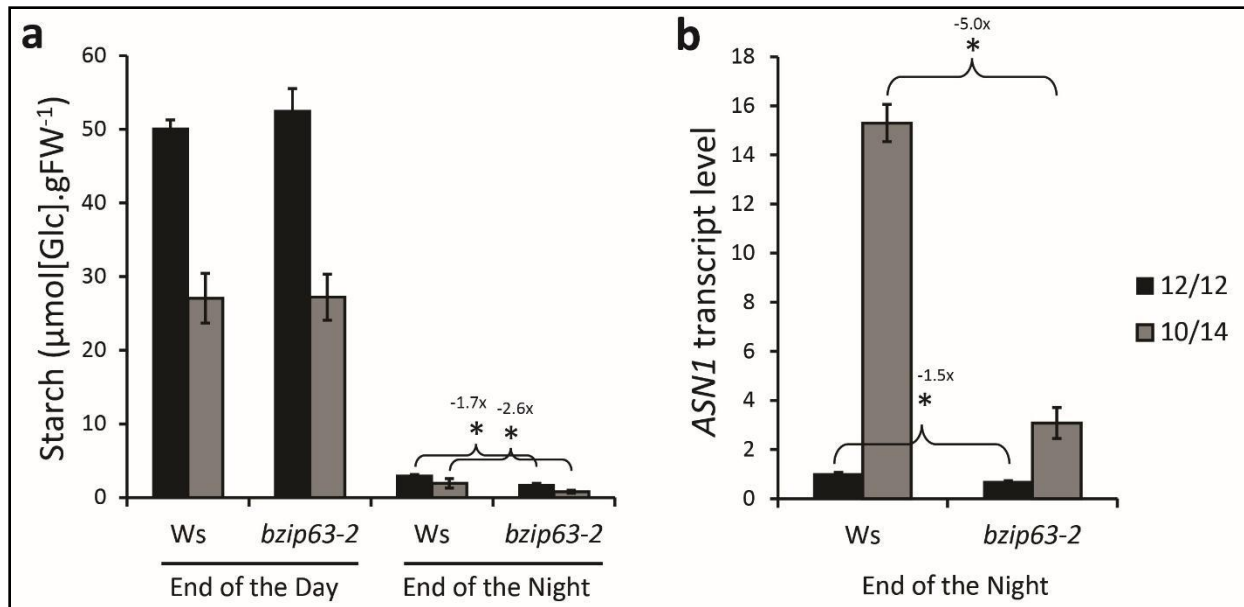

**Fig. S6 Starch availability in short day versus 12-12 photoperiods.** (a) Starch amounts in leaves of *bzip63-2* mutant compared to *Ws* grown under equinoctial or short day conditions, at ED (ZT = 12 h in 12-12; ZT = 10 h in short day) and EN (ZT = 24 h in 12-12 and short day). The average amount of starch was calculated from data obtained in two independent experiments, with five biological replicates, and each replicate consisted of leaves collected from six 30-day old plants cultivated in soil at 22° C and PAR = 100  $\mu\text{mol}\cdot\text{m}^{-2}\cdot\text{s}^{-1}$  (Student's *t*-test;  $n = 60$  for starch;  $*P < 0.05$ ). Values are means, and error bars indicate standard deviation. (b) The transcript levels at EN of energy deficit marker gene *ASN1*, in *bzip63-2* mutant compared to *Ws* grown under 12-12 and short day photoperiods. Data were obtained from three independent experiments, with three biological replicates, and each replicate consisted of four youngest leaves and the shoot apical meristems collected from five 25-day old plants (Student's *t*-test;  $n = 9$ ;  $*P < 0.05$ ). Values are means, and error bars indicate standard deviation.

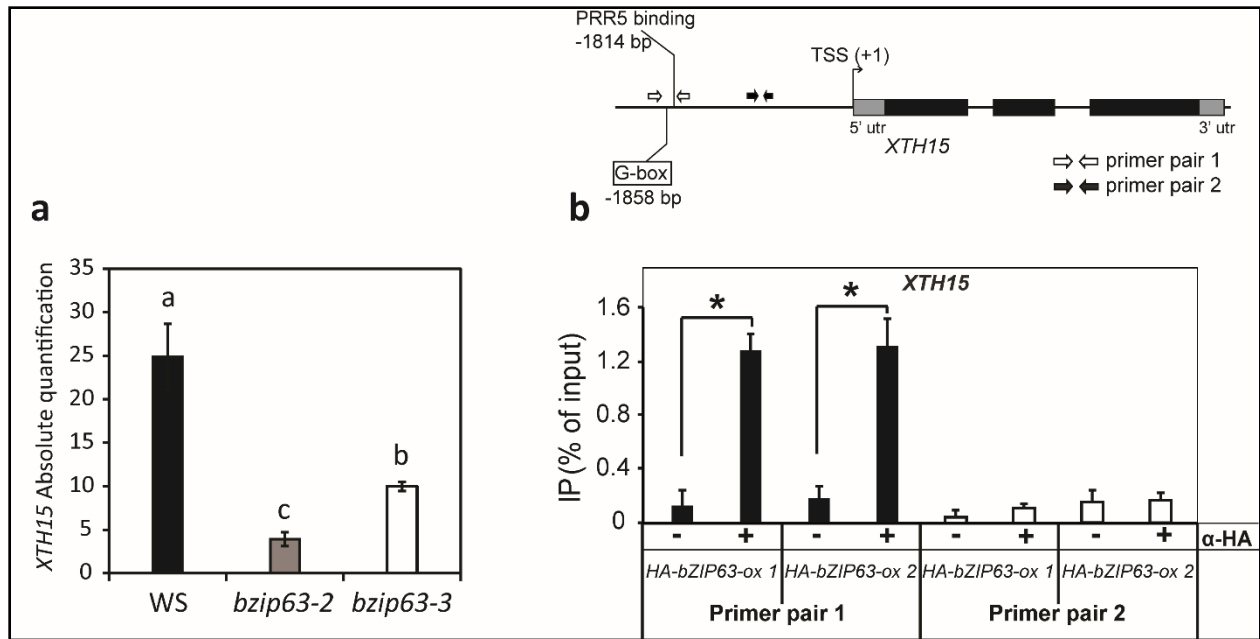

**Fig. S7 bZIP63 binds to cell wall modification gene.** (a) The absolute transcript levels of *XTH15*, which is involved in cell wall modification, are lower in *bzip63-2* and *bzip63-3* at EN. Data were obtained from three independent experiments, with three biological replicates, and each replicate consisted of four youngest leaves and the shoot apical meristems collected from five 25-day old plants, differences were tested performing ANOVA and the different letters indicate groups that are significantly different (Tukey's HSD test,  $P < 0.05$ ). Values are means, and error bars indicate standard deviation. (b) Enrichment of specific bZIP63-bound cis regulatory regions of *XTH15* in two independent transgenic lines: *HA-bZIP63-ox1* and *HA-bZIP63-ox2*. bZIP63 binding to *XTH15* cis regulatory sequences were assessed by ChIP as described in Supplementary Fig. 3. Data were obtained from three independent experiments for *HA-bZIP63-ox1* and six for *HA-bZIP63-ox2* (Student's *t*-test;  $*P < 0.05$ ). Values are means, and error bars indicate standard deviation.

**Table S1**

Spreadsheet\_Up bzip63-2 EN: Up-regulated genes in bzip63-2 plants compared with the wild type ( $p < 0.05$ ) at the end of the night. Annotation was performed on TAIR10. Fold-change is ATH1 GeneChip.

Spreadsheet\_Down bzip63-2 EN: Down-regulated genes in bzip63-2 plants compared with the wild type ( $p < 0.05$ ) at the end of the night. Annotation was performed on TAIR10. Fold-change is ATH1.

Spreadsheet\_Classes: Classes of differentially expressed genes in bzip63-2 mutant at the end of the night.

**Table S2** Genes related to circadian clock, starch degradation and energy stress deregulated in bZIP63 mutants at end of the night (ZT24).

| Biological Process               | Gene name      | AGI       | <i>bzip63-2<sup>a</sup></i> | <i>bzip63-3<sup>b</sup></i> | <i>HA-bZIP63 ox2<sup>c</sup></i> | <i>HA-bZIP63 ox1<sup>c</sup></i> | HA-bZIP63 binding | CCA1 binding <sup>d</sup> | PRR7 binding <sup>e</sup> | PRR5 binding <sup>e</sup> | Oscilate in LL <sup>f</sup> |
|----------------------------------|----------------|-----------|-----------------------------|-----------------------------|----------------------------------|----------------------------------|-------------------|---------------------------|---------------------------|---------------------------|-----------------------------|
|                                  | <b>bZIP63</b>  | AT5G28770 | -                           | -                           | 2.6                              | 4.2                              | ..                |                           |                           |                           | Yes                         |
| Circadian clock                  | <b>PRR7</b>    | AT5G02810 | -1.5                        | -1.5                        | 1.9                              | 2.0                              |                   |                           |                           |                           | Yes                         |
| Energy stress-responsive genes   | <b>ASN1</b>    | AT3G47340 | -4.2                        | -5.2                        | 2.1                              | 3.8                              |                   |                           |                           |                           | Yes                         |
|                                  | <b>BTB/POZ</b> | AT2G30600 | -7.4                        | -3.0                        | 1.7                              | 6.0                              |                   |                           |                           |                           | Yes                         |
|                                  | <b>KMD4</b>    | AT3G59940 | -1.7                        | -1.3                        | 1.2                              | 1.6                              | ..                |                           |                           |                           | Yes                         |
|                                  | <b>DIN10</b>   | AT5G20250 | -1.5                        | -1.6                        | 1.1                              | 1.0                              | ..                |                           |                           |                           | Yes                         |
|                                  | <b>BAM9</b>    | AT5G18670 | -1.9                        | 1.0                         | 1.5                              | 2.4                              |                   |                           |                           |                           | Yes                         |
|                                  | <b>BGAL4</b>   | AT5G56870 | 5.3                         | 3.6                         | 1.2                              | 1.1                              |                   |                           |                           |                           | No                          |
| Starch degradation-related genes | <b>DRM1</b>    | AT1G28330 | 1.9                         | 1.5                         | 1.3                              | 1.4                              |                   |                           |                           |                           | Yes                         |
|                                  | <b>SEX1</b>    | AT1G10760 | 1.6                         | 2.0                         | -1.4                             | -1.6                             |                   |                           |                           |                           | Yes                         |
|                                  | <b>PWD</b>     | AT5G26570 | 1.5                         | 1.4                         | 1.0                              | 1.0                              |                   |                           |                           |                           | Yes                         |
|                                  | <b>DPE2</b>    | AT2G40840 | 1.5                         | 1.9                         | 2.0                              | 2.0                              |                   |                           |                           |                           | Yes                         |

 bound  
 not bound

- ..** Not tested in ChIP HA-bZIP63  
**a** T-DNA insertion mutant (FLAG\_610A08, Ws background) (Matiolli et al., 2011).  
**b** T-DNA insertion mutant (FLAG\_532A10, Ws background; Supplementary Fig. 1a-b).  
**c** *HA-bZIP63-ox2* were obtained in Ws, and *HA-bZIP63-ox1* was obtained in *bzip63-2*.  
**d** Data from Nagel et al., 2015, PNAS.  
**e** Data from Liu et al., 2016, Plant Physiology.  
**f** Data from Diurnal, Mockler et al., 2007.

**Table S3** Relative metabolite content at EN in leaves of *bzip63-2* as compared to Ws.

| Metabolite                        | Ws                         |      | <i>bzip63-2</i>            |      | <i>P</i>     |
|-----------------------------------|----------------------------|------|----------------------------|------|--------------|
|                                   | avg nmol.gFW <sup>-1</sup> | sdv  | avg nmol.gFW <sup>-1</sup> | sdv  |              |
| Lactate                           | 1,23                       | 0,20 | 1,22                       | 0,12 | 0,959        |
| 2-Hydroxypyridine                 | 1,11                       | 0,17 | 1,19                       | 0,22 | 0,593        |
| Alanine                           | 1,13                       | 0,29 | 1,15                       | 0,33 | 0,949        |
| Pyruvate                          | 0,93                       | 0,20 | 0,87                       | 0,10 | 0,723        |
| Valine                            | 0,94                       | 0,22 | 0,88                       | 0,22 | 0,720        |
| Glycerol                          | 1,18                       | 0,15 | 1,39                       | 0,33 | 0,312        |
| Leucine                           | 1,04                       | 0,09 | 1,05                       | 0,12 | 0,884        |
| Isoleucine                        | 0,92                       | 0,14 | 1,05                       | 0,13 | 0,201        |
| Glycine                           | 0,20                       | 0,02 | 0,15                       | 0,02 | <b>0,017</b> |
| Orthophosphate                    | 1,78                       | 0,28 | 1,30                       | 0,32 | 0,070        |
| Proline                           | 0,78                       | 0,22 | 0,86                       | 0,28 | 0,727        |
| Glycerate                         | 0,25                       | 0,03 | 0,29                       | 0,02 | 0,075        |
| Benzoate                          | 1,34                       | 0,09 | 1,62                       | 0,24 | 0,098        |
| Serine                            | 0,54                       | 0,12 | 0,53                       | 0,14 | 0,893        |
| Succinate                         | 1,96                       | 0,39 | 1,55                       | 0,29 | 0,104        |
| Threonine                         | 0,42                       | 0,08 | 0,46                       | 0,09 | 0,541        |
| C4H4O4 [Fumarate Maleate]         | 0,80                       | 0,16 | 0,48                       | 0,09 | <b>0,003</b> |
| Nonanoate                         | 1,07                       | 0,22 | 1,40                       | 0,31 | 0,221        |
| Uracil                            | 1,38                       | 0,11 | 1,17                       | 0,24 | 0,283        |
| b-Alanine                         | 0,89                       | 0,12 | 1,03                       | 0,15 | 0,187        |
| Citramalate                       | 1,06                       | 0,15 | 1,03                       | 0,08 | 0,789        |
| Malate                            | 0,35                       | 0,07 | 0,25                       | 0,05 | <b>0,044</b> |
| trans-4-Hydroxyproline            | 0,96                       | 0,17 | 1,06                       | 0,08 | 0,356        |
| 4-Aminobutanoate                  | 0,99                       | 0,10 | 1,02                       | 0,24 | 0,927        |
| Aspartate                         | 1,12                       | 0,07 | 1,26                       | 0,12 | <b>0,044</b> |
| Asparagine (4TMS) MP              | 0,45                       | 0,17 | 0,77                       | 0,26 | 0,176        |
| Methionine                        | 0,67                       | 0,11 | 0,62                       | 0,11 | 0,577        |
| Arginine                          | 0,55                       | 0,07 | 0,64                       | 0,05 | 0,080        |
| C5H10O5 [Xylose Arabinose Lyxose] | 0,83                       | 0,31 | 0,81                       | 0,23 | 0,995        |
| (r x) Xylitol                     | 0,86                       | 0,19 | 0,93                       | 0,10 | 0,590        |
| (r x) C5H10O5 [Ribose Ribulose]   | 0,92                       | 0,28 | 0,90                       | 0,31 | 0,894        |
| 5-Oxoproline                      | 0,92                       | 0,07 | 1,00                       | 0,07 | 0,126        |
| Glutamate                         | 1,17                       | 0,13 | 1,05                       | 0,12 | 0,197        |
| (r x) Putrescine                  | 0,73                       | 0,19 | 0,65                       | 0,16 | 0,561        |
| C6H12O5 [Fucose Epifucose]        | 0,97                       | 0,03 | 1,05                       | 0,04 | <b>0,032</b> |
| Ketoglutarate - 2OG               | 1,20                       | 0,11 | 0,90                       | 0,12 | <b>0,035</b> |
| Glutamine                         | 0,55                       | 0,44 | 0,73                       | 0,18 | 0,420        |
| Phenylalanine                     | 0,63                       | 0,06 | 0,73                       | 0,10 | 0,091        |
| Asparagine                        | 1,49                       | 0,16 | 1,43                       | 0,23 | 0,607        |
| Agmatine                          | 0,86                       | 0,09 | 0,92                       | 0,07 | 0,447        |
| Ornithine                         | 1,22                       | 0,02 | 0,92                       | 0,09 | <b>0,002</b> |
| Fructose [[Psicose]               | 0,81                       | 0,07 | 0,83                       | 0,10 | 0,755        |

**Table S3. continuation**

|                                       |      |      |      |      |              |
|---------------------------------------|------|------|------|------|--------------|
| (r x) Shikimate                       | 0,88 | 0,12 | 0,92 | 0,12 | 0,618        |
| Glucose                               | 1,50 | 0,13 | 1,68 | 0,17 | 0,095        |
| Citrate                               | 1,55 | 0,16 | 1,72 | 0,16 | 0,126        |
| Isocitrate                            | 1,54 | 0,22 | 1,58 | 0,10 | 0,685        |
| Citrulline                            | 0,44 | 0,01 | 0,54 | 0,03 | <b>0,003</b> |
| Tetradecanoate                        | 1,08 | 0,60 | 1,33 | 0,58 | 0,578        |
| Dehydroascorbate_MP                   | 1,53 | 0,38 | 1,46 | 0,42 | 0,804        |
| Gluconolactone                        | 1,44 | 0,14 | 1,27 | 0,29 | 0,330        |
| Dehydroascorbate                      | 1,77 | 0,56 | 1,41 | 0,44 | 0,395        |
| Tyramine                              | 0,96 | 0,26 | 1,23 | 0,24 | 0,220        |
| myo-Inositol                          | 0,97 | 0,26 | 1,07 | 0,24 | 0,565        |
| Tyrosine                              | 0,97 | 0,06 | 0,97 | 0,05 | 0,999        |
| C8H15NO6 [N-Acetyl-[Glc Gal]]         | 1,10 | 0,36 | 0,88 | 0,11 | 0,458        |
| Histidine                             | 1,66 | 0,46 | 1,68 | 0,41 | 0,933        |
| Adenine                               | 0,95 | 0,06 | 1,18 | 0,07 | <b>0,003</b> |
| (r z) Spermidine                      | 1,04 | 0,23 | 1,18 | 0,17 | 0,368        |
| C6H13O9P [Glc 6-P Gal 6-P]            | 1,20 | 0,11 | 0,92 | 0,05 | <b>0,006</b> |
| Sucrose                               | 0,56 | 0,05 | 0,48 | 0,09 | 0,135        |
| (r x) Maltose_best                    | 3,06 | 0,21 | 1,75 | 0,15 | <b>0,000</b> |
| (r x) Maltose2                        | 1,19 | 0,09 | 0,97 | 0,05 | <b>0,002</b> |
| Trehalose                             | 1,26 | 0,31 | 1,10 | 0,15 | 0,427        |
| Galactinol                            | 0,89 | 0,22 | 0,88 | 0,17 | 0,988        |
| (r x) Raffinose 1-Kestose Inulotriose | 0,62 | 0,15 | 0,62 | 0,23 | 0,983        |

Number in bold style are significantly different by Student's *t*-test; \**P* < 0.05.

**Table S4** List of primers used for quantification of the mRNA levels and immunoprecipitated sequences by RT-qPCR and amplification of genomic DNA.

| <b>Primer name</b> | <b>Sequence 5' - 3'</b> | <b>Function</b>                                                          | <b>Amplification efficiency<br/>E = [ 10<sup>^</sup>(-1/slope)-1]</b> |
|--------------------|-------------------------|--------------------------------------------------------------------------|-----------------------------------------------------------------------|
| bZIP63a-Fw         | TCTCCGACGAAGAAATCTCC    | Quantify the mRNA levels by RT-qPCR. First exon                          | 0.97                                                                  |
| bZIP63a-Rv         | GTATGAAACGATTGAATGCCC   | Quantify the mRNA levels by RT-qPCR. First exon                          |                                                                       |
| bZIP63b-Fw         | GGAACCTTTCATCAAACCTCAG  | Quantify the mRNA levels by RT-qPCR. First and second exon-exon junction | 0.94                                                                  |
| bZIP63b-Rv         | CACTGCTCATCATTGGTGTAG   | Quantify the mRNA levels by RT-qPCR. Second exon                         |                                                                       |
| bZIP63c-Fw         | TGAACCCTACTAATGTAAACG   | Quantify the mRNA levels by RT-qPCR. Third exon                          | 1.06                                                                  |
| bZIP63c-Rv         | CTGTGAAACTTGTGTCTCTAG   | Quantify the mRNA levels by RT-qPCR. Fourth and fifth exon-exon junction |                                                                       |
| bZIP63d-Fw         | CTAGAGACACAAGTTTCACAG   | Quantify the mRNA levels by RT-qPCR. Fourth and fifth exon-exon junction | 1.03                                                                  |
| bZIP63d-Rv         | CTTCACTGTCTCTTCAGCCAT   | Quantify the mRNA levels by RT-qPCR. Sixth exon                          |                                                                       |
| bZIP63e-Fw         | GCAAGGCCTTGATAGGGTG     | Quantify the mRNA levels by RT-qPCR. Middle of sixth exon                | 0.98                                                                  |
| bZIP63e-Rv         | CTGATCCCCAACGCTTCGAA    | Quantify the mRNA levels by RT-qPCR. End of sixth exon                   |                                                                       |
| XTH15/XTR7 Fw      | AACACATCATATTCTTGGTGGA  | Quantify the mRNA levels by RT-qPCR                                      | 0.87                                                                  |
| XTH15/XTR7 Rv      | AGTAGATCCTCATGGGTTGAC   | Quantify the mRNA levels by RT-qPCR                                      |                                                                       |
| XTH16 Fw           | CCACAACACATCATATTTATGG  | Quantify the mRNA levels by RT-qPCR                                      | 0.89                                                                  |
| XTH16 Rv           | GTAGCCCAATCATCTGCAT     | Quantify the mRNA levels by RT-qPCR                                      |                                                                       |
| XTH33 Fw           | CTCCCACCATACTGTATTTTTG  | Quantify the mRNA levels by RT-qPCR                                      | 0.95                                                                  |
| XTH33 Rv           | GTTGACGGGGTACTTACCAC    | Quantify the mRNA levels by RT-qPCR                                      |                                                                       |
| XTH27 Fw           | CTCACATCATATTCTTTGTAGAC | Quantify the mRNA levels by RT-qPCR                                      | 1.04                                                                  |
| XTH27 Rv           | GTTGCCCATTTAGAACCGTC    | Quantify the mRNA levels by RT-qPCR                                      |                                                                       |
| XTH6 Fw            | CACATTGTTTTTACGTAGACG   | Quantify the mRNA levels by RT-qPCR                                      | 1.09                                                                  |
| XTH6 Rv            | CAGTCATCTGCTTCCCATAAT   | Quantify the mRNA by RT-qPCR                                             |                                                                       |
| AT4G15620 Fw       | ATGGAACACGAGGGCAAG      | Quantify the mRNA by RT-qPCR                                             | 1.10                                                                  |
| AT4G15620 Rv       | TAAGGAAGCTTAATAGCGTC    | Quantify the mRNA by RT-qPCR                                             |                                                                       |
| ATEXLA2 Fw         | ATACAGGAGAGTTCCTTGCG    | Quantify the mRNA by RT-qPCR                                             | 0.86                                                                  |
| ATEXLA2 Rv         | TGTAATGGCTACCACTTCAG    | Quantify the mRNA by RT-qPCR                                             |                                                                       |
| PRR7 Fw            | TTCCGAAAGAAGGTACGATAC   | Quantify the mRNA by RT-qPCR                                             | 1.06                                                                  |

**Table S4. Continuation**

|              |                        |                                     |      |
|--------------|------------------------|-------------------------------------|------|
| PRR7 Rv      | GCTATCCTCAATGTTTTTATGT | Quantify the mRNA levels by RT-qPCR |      |
| PGM Fw       | ACCTTTAATCGATCTTGCATTG | Quantify the mRNA levels by RT-qPCR | 1.05 |
| PGM Rv       | CATGTAATGACAGTGGGCTTC  | Quantify the mRNA levels by RT-qPCR |      |
| SEX1 Fw      | CCTCTACGACAGTGTACCAA   | Quantify the mRNA levels by RT-qPCR | 1.07 |
| SEX1 Rv      | TCCAGCGCGTGCAATGTCT    | Quantify the mRNA levels by RT-qPCR |      |
| PYL5 Fw      | GAGGCTCGAGATCTTGGACG   | Quantify the mRNA levels by RT-qPCR | 1.10 |
| PYL5 Rv      | CGCGTGTAGTGTGTCACC     | Quantify the mRNA levels by RT-qPCR |      |
| PYL8 Fw      | CTCCTGTTTCATATTGTGTGGT | Quantify the mRNA levels by RT-qPCR | 1.17 |
| PYL8 Rv      | ACTGTACCAATCTCCATGTTTC | Quantify the mRNA levels by RT-qPCR |      |
| BAM9 Fw      | GAGCACCAATCACCTGAATC   | Quantify the mRNA levels by RT-qPCR | 1.02 |
| BAM9 Rv      | CGACTCCTTGTTTCTTGCAG   | Quantify the mRNA by RT-qPCR        |      |
| At4G15620 Fw | TGTCGGCATTGTGTACAACA   | Quantify the mRNA levels by RT-qPCR | 1.10 |
| At4G15620 Rv | TCTTGCTTCTTCTCCCTG     | Quantify the mRNA levels by RT-qPCR |      |
| At2g30600 Fw | AAAGCCTATGCGGGTACTTC   | Quantify the mRNA levels by RT-qPCR | 1.04 |
| At2g30600 Rv | CTGATGTTCTTCGCCTAAGTC  | Quantify the mRNA levels by RT-qPCR |      |
| BGAL4 Fw     | TTAACCTGGTACAAGTCTACG  | Quantify the mRNA levels by RT-qPCR | 0.93 |
| BGAL4 Rv     | GACGTCCAATATTTCTACCG   | Quantify the mRNA levels by RT-qPCR |      |
| RT_PP2AA3 Fw | CATGTTCCAAACTCTTACCTG  | Quantify the mRNA levels by RT-qPCR | 1.01 |
| RT_PP2AA3 Rv | GTTCTCCACAACCGCTTGGT   | Quantify the mRNA levels by RT-qPCR |      |
| Actin2 Fw    | CGTACAACCGGTATTGTGCTGG | Quantify the mRNA levels by RT-qPCR | 0.98 |
| Actin2 Rv    | CTCTCTGTGAAGGATCTTCATG | Quantify the mRNA levels by RT-qPCR |      |
| PWD Fw       | AGAAACAATCAACAGCATAAGC | Quantify the mRNA levels by RT-qPCR | 1.10 |
| PWD Rv       | GATTGATTCATAGAGTCCTGC  | Quantify the mRNA levels by RT-qPCR |      |
| DPE2 Fw      | ACTGGAGATACCGGTACA     | Quantify the mRNA by RT-qPCR        | 1.01 |
| DPE2 Rv      | CATTAGCAGGAACAGATCTTC  | Quantify the mRNA by RT-qPCR        |      |
| AtSPS4F Fw   | ACAAGCACTCAGGTATCTTTC  | Quantify the mRNA by RT-qPCR        | 1.02 |
| AtSPS4F Rv   | GAATGATGGTTTTGTGGAGGC  | Quantify the mRNA by RT-qPCR        |      |
| AtSPS1F Fw   | AGCTCTGAGGTATTTGTTTCG  | Quantify the mRNA by RT-qPCR        | 0.98 |
| AtSPS1F Rv   | TGCACGACACTCCCTTTAG    | Quantify the mRNA by RT-qPCR        |      |
| At3G59940 Fw | GGAAGTAATTATGGATACGAT  | Quantify the mRNA by RT-qPCR        | 0.95 |



**Table S4. Continuation**

|              |                         |                                     |      |
|--------------|-------------------------|-------------------------------------|------|
| At3G59940 Rv | CGTCGTCTTCACCATCATC     | Quantify the mRNA levels by RT-qPCR |      |
| At1G76410 Fw | ACATGGTTTCCACGTATCGT    | Quantify the mRNA levels by RT-qPCR | 0.97 |
| At1G76410 Rv | GTAACCCGCCACATTTATGA    | Quantify the mRNA levels by RT-qPCR |      |
| PIF4 Fw      | CACTGCAGTAAACTGATAAAG   | Quantify the mRNA levels by RT-qPCR | 1.01 |
| PIF4 Rv      | ACTGCTGAGGTTGAACTCCG    | Quantify the mRNA levels by RT-qPCR |      |
| LHY Fw       | AGAGGGTCGTATAGCGTTTC    | Quantify the mRNA levels by RT-qPCR | 1.16 |
| LHY Rv       | GCAGCACAGAATCCTGGC      | Quantify the mRNA levels by RT-qPCR |      |
| CCA1 Fw      | GTCTGACGAGGGTCGAATT     | Quantify the mRNA levels by RT-qPCR | 1.01 |
| CCA1 Rv      | CTGAGCTGTGAAGTTAAGATC   | Quantify the mRNA levels by RT-qPCR |      |
| GBS1 Fw      | TGATCACTGCTGGAGCTGAC    | Quantify the mRNA levels by RT-qPCR | 0.95 |
| GBS1 Rv      | CCATATCTCATTGCGTGCAG    | Quantify the mRNA levels by RT-qPCR |      |
| ASN1 Fw      | AGGTGCGGACGAGATCTTTG    | Quantify the mRNA levels by RT-qPCR | 0.95 |
| ASN1 Rv      | GTGAAGAGCCTTGATCTTGC    | Quantify the mRNA levels by RT-qPCR |      |
| KIN10 Fw     | GATAACAACACTTTGGAGAC    | Quantify the mRNA levels by RT-qPCR | 0.94 |
| KIN10 Rv     | CGAGTTTATACAACGAATTC    | Quantify the mRNA levels by RT-qPCR |      |
| DRM1 Fw      | GGAGAAGGGAGCAGCAGTA     | Quantify the mRNA levels by RT-qPCR | 1.05 |
| DRM1 Rv      | GAGTGGTTGGAGTCGTTGGA    | Quantify the mRNA levels by RT-qPCR |      |
| TOC1 Fw      | CACATCTTGCAGCATAGTCA    | Quantify the mRNA levels by RT-qPCR | 1.15 |
| TOC1 Rv      | TGTCAAGTTTATTTACCCTCAC  | Quantify the mRNA levels by RT-qPCR |      |
| CHE Fw       | GGATTTCCGACAAGTCTGGA    | Quantify the mRNA by RT-qPCR        | 1.04 |
| CHE Rv       | TGTTGCTGCTGGTGGCGGA     | Quantify the mRNA by RT-qPCR        |      |
| DIN10 Fw     | TGTCAGTGATTCTCCTGGAA    | Quantify the mRNA by RT-qPCR        | 1.02 |
| DIN10 Rv     | CACCATCACGGCAGGATC      | Quantify the mRNA by RT-qPCR        |      |
| ProDH Fw     | CGCTATACCGTATCTTCTCC    | Quantify the mRNA by RT-qPCR        | 1.1  |
| ProDH Rv     | CTCTTAAGTTCCATCCTCATG   | Quantify the mRNA by RT-qPCR        |      |
| SEX1 1 Fw    | GGAGTCCACAGATACCGTCC    | Quantify ChIP sequences by qPCR     | 1.04 |
| SEX1 1 Rv    | CGACACTTTATCCTTCGATTCCA | Quantify ChIP sequences by qPCR     |      |
| SEX1 2 Fw    | ACGTGGTGAATCGAAGGAT     | Quantify ChIP sequences by qPCR     | 1.17 |
| SEX1 2 Rv    | GGGGTTTCTTCGCTCTTTGT    | Quantify ChIP sequences by qPCR     |      |
| SEX1 3 Fw    | CCATTCTCCTTCTTGAACCCA   | Quantify ChIP sequences by qPCR     | 0.99 |
| SEX1 3 Rv    | AGTTTGTGTTTGTCTTTGTCCT  | Quantify ChIP sequences by qPCR     |      |
| ASN1 1 Fw    | TGGAAGAAACCGACAAAAG     | Quantify ChIP sequences by qPCR     | 1.03 |

**Table S4. Continuation**

|                |                         |                                                |      |
|----------------|-------------------------|------------------------------------------------|------|
| ASN1 1 Rv      | ACCAGCTGTTTCCACGTGTT    | Quantify ChIP sequences by qPCR                |      |
| ASN1 2 Fw      | AATCAAATACACCATTGTTCGTG | Quantify ChIP sequences by qPCR                | 1.1  |
| ASN1 2 Rv      | CGGTGTAAAAACTGTCCAATG   | Quantify ChIP sequences by qPCR                |      |
| BAM9 1 Fw      | TAACGACACGTGTAATGTCCAA  | Quantify ChIP sequences by qPCR                | 0.91 |
| BAM9 1 Rv      | TTCGATTATGGACACAAAGGAG  | Quantify ChIP sequences by qPCR                |      |
| BAM9 2 Fw      | GGGAATATACTTGCATGGACCT  | Quantify ChIP sequences by qPCR                | 0.97 |
| BAM9 2 Rv      | AATGAGAAAAAGCCACGTCA    | Quantify ChIP sequences by qPCR                |      |
| XTH15 1 Fw     | TGCCGGCTGGAATAGATAGA    | Quantify ChIP sequences by qPCR                | 0.98 |
| XTH15 1 Rv     | ATGGCCACTCTTCTCCCTTT    | Quantify ChIP sequences by qPCR                |      |
| XTH15 2 Fw     | TCCATAAGAGAGAATGGTGTGG  | Quantify ChIP sequences by qPCR                | 0.89 |
| XTH15 2 Rv     | TCGCATCCTCTACATAGTGAT   | Quantify ChIP sequences by qPCR                |      |
| AT2G30600 1 Fw | GCATCTGATTGTTTTGCTCGTG  | Quantify ChIP sequences by qPCR                | 1.02 |
| AT2G30600 1 Rv | CTGGCTTCATACCCCACCAT    | Quantify ChIP sequences by qPCR                |      |
| AT2G30600 2 Fw | CGTATTCGTGTCTCTCATTTCT  | Quantify ChIP sequences by qPCR                | 0.89 |
| AT2G30600 2 Rv | TCCGAGCGTACCTAATGAACT   | Quantify ChIP sequences by qPCR                |      |
| BGAL 1 Fw      | AGCTCAGAATATAGAGGCGCA   | Quantify ChIP sequences by qPCR                | 0.93 |
| BGAL 1 Rv      | AAGTCAAGTTGCCGCATTCA    | Quantify ChIP sequences by qPCR                |      |
| BGAL 2 Fw      | TTCTTTAGGCAAGTCCGGT     | Quantify ChIP sequences by qPCR                | 0.86 |
| BGAL 2 Rv      | TCATCTTGACTCTTGAGAACGAA | Quantify ChIP sequences by qPCR                |      |
| DRM1 1 Fw      | TATGGTTGGATCTGACGGCC    | Quantify ChIP sequences by qPCR                | 0.87 |
| DRM1 1 Rv      | TGGGAAGATGTCTCCATACGG   | Quantify ChIP sequences by qPCR                |      |
| DRM1 2 Fw      | TGGAAACCTTTTGTGCGACA    | Quantify ChIP sequences by qPCR                | 1.14 |
| DRM1 2 Rv      | TCTTCTGAGTCAAAGCCGGT    | Quantify ChIP sequences by qPCR                |      |
| DPE2 1 Fw      | AGCCCTCTTCAATGGCGG      | Quantify ChIP sequences by qPCR                | 1.13 |
| DPE2 1 Rv      | CGAGTAGTGCCAGCTGAAAG    | Quantify ChIP sequences by qPCR                |      |
| DPE2 2 Fw      | CGGTTTGTTC AAGCAAAGGT   | Quantify ChIP sequences by qPCR                | 0.94 |
| DPE2 2 Rv      | AGAAATCAGCAACACGCAAG    | Quantify ChIP sequences by qPCR                |      |
| DPE2 1b Fw     | TCTTTGGTCTCACTTTGGTCTC  | Quantify ChIP sequences by qPCR                | 0.95 |
| DPE2 1b Rv     | TGAGAGAGATAGAGAGTGAAGCA | Quantify ChIP sequences by qPCR                |      |
| DPE2 2b Fw     | TGGACACTCTTGAGCGATCT    | Quantify ChIP sequences by qPCR                | 0.95 |
| DPE2 2b Rv     | TTGTTCAATCGCTCTGCACC    | Quantify ChIP sequences by qPCR                |      |
| bZIP63gen-Fw   | ATCTCCGGTAACCATCACTG    | Amplify <i>bZIP63</i> genomic DNA. First exon  | -    |
| bZIP63gen-Rv   | CACCATTGTCAGATCTACCA    | Amplify <i>bZIP63</i> genomic DNA. Second exon | -    |
| Rb4            | GGGTTGGGGTTTCTACAGAC    | Annealing in the right border of T-DNA         | -    |

**Table S5** Circadian parameters calculated from two 24 h cycles under free-running conditions.

| Gene Name | Genotype        | Condition | Algorithm           |           |        |         |            |                     |                  |               |                    |                        |
|-----------|-----------------|-----------|---------------------|-----------|--------|---------|------------|---------------------|------------------|---------------|--------------------|------------------------|
|           |                 |           | COSOPT              |           | BRASS  |         | JTK Cycle  |                     |                  | Meta Cycle 2D |                    |                        |
|           |                 |           | Period <sup>1</sup> | pMMC-Beta | Period | Rel-Per | Adj.Pvalue | Period <sup>1</sup> | LAG <sup>1</sup> | Pvalue        | Phase <sup>1</sup> | Amplitude <sup>1</sup> |
| CCA1      | <i>bzip63-2</i> | LL        | 23.1                | 0.006     | 23.2   | 0.07    | 0.00004    | 24                  | 0                | 0.0000        | <b>23.1</b> *      | 41.4                   |
| PRR7      | <i>bzip63-2</i> | LL        | 22.3                | 0.022     | 23.3   | 0.09    | 0.02074    | 24                  | 8                | 0.0004        | 7.1                | <b>8.8</b> *           |
| TOC1      | <i>bzip63-2</i> | LL        | 21.8                | 0.027     | 22.6   | 0.17    | 0.00155    | 24                  | 14               | 0.0000        | 14.1               | <b>3.2</b> *           |
| GBS1      | <i>bzip63-2</i> | LL        | 23.1                | 0.010     | 22.8   | 0.09    | 0.00070    | 24                  | 22               | 0.0000        | 21.7               | 23.6                   |
| SEX1      | <i>bzip63-2</i> | LL        | 22.1                | 0.017     | 23.6   | 0.21    | 0.00320    | 28                  | <b>8</b> *       | 0.0000        | <b>8.3</b> *       | <b>2.5</b> *           |
| PWD       | <i>bzip63-2</i> | LL        | 24.1                | 0.012     | --     | --      | 0.00030    | 24                  | 14               | 0.0000        | <b>12.3</b> *      | 1.3                    |
| DPE2      | <i>bzip63-2</i> | LL        | 22.2                | 0.059     | --     | --      | 0.14690    | 28                  | <b>6</b> *       | 0.0273        | <b>7.0</b> *       | 1.0                    |
| bZIP63    | <i>cca1/lhy</i> | LL        | <b>16.6</b>         | 0.126     | 24.9   | 0.22    | 0.22258    | <b>16</b>           | 4                | 0.0790        | 11.2               | 1.5                    |
| GBS1      | <i>cca1/lhy</i> | LL        | <b>15.2</b>         | 0.034     | 15.4   | 0.03    | 0.47480    | <b>16</b>           | 8                | 0.6837        | 1.5                | 0.2                    |
| KMD4      | <i>cca1/lhy</i> | LL        | 20.0                | 0.606     | --     | --      | 0.40185    | 28                  | 4                | 0.0921        | 2.9                | 0.3                    |
| BAM9      | <i>cca1/lhy</i> | LL        | 13.7                | 0.042     | 25.4   | 0.23    | 1          | 28                  | 24               | 0.9421        | 21.3               | 0.4                    |
| CCA1      | Ws              | LL        | 24.1                | 0.008     | 24.2   | 0.11    | 0.00155    | 24                  | 0                | 0.0000        | 23.8               | 43.8                   |
| PRR7      | Ws              | LL        | 22.4                | 0.020     | 22.6   | 0.14    | 0.00320    | 24                  | 6.0              | 0.0000        | 7.5                | 15.2                   |
| TOC1      | Ws              | LL        | 22.3                | 0.015     | 22.4   | 0.15    | 0.00155    | 24                  | 12.0             | 0.0000        | 12.6               | 6.9                    |
| GBS1      | Ws              | LL        | 24.1                | 0.024     | 24.2   | 0.17    | 0.00001    | 24                  | 0.0              | 0.0000        | 23.4               | 26.8                   |
| SEX1      | Ws              | LL        | 22.6                | 0.021     | 22.7   | 0.22    | 0.02074    | 24                  | 10.0             | 0.0006        | 10.8               | 3.9                    |
| PWD       | Ws              | LL        | 22.8                | 0.017     | 22.9   | 0.19    | 0.07661    | 24                  | 14.0             | 0.0002        | 13.3               | 1.3                    |
| DPE2      | Ws              | LL        | 22.9                | 0.008     | 22.6   | 0.13    | 0.00237    | 24                  | 8.0              | 0.0000        | 9.7                | 1.3                    |
| bZIP63    | Ws              | LL        | <b>22.2</b>         | 0.038     | 24.1   | 0.16    | 0.00625    | <b>24</b>           | 4.0              | 0.0001        | 4.9                | 2.6                    |
| GBS1      | Ws              | LL        | <b>23.8</b>         | 0.047     | 24.2   | 0.21    | 0.00030    | <b>24</b>           | 0.0              | 0.0000        | 23.5               | 5.3                    |
| KMD4      | Ws              | LL        | 22.5                | 0.026     | 22.4   | 0.18    | 0.02815    | 24                  | 8.0              | 0.0005        | 9.4                | 1.0                    |
| BAM9      | Ws              | LL        | 23.1                | 0.017     | 25.0   | 0.24    | 0.00070    | 24                  | 22.0             | 0.0000        | 22.8               | 1.3                    |
| CCA1      | <i>bzip63-2</i> | LD        | 24.2                | 0.068     | 22.6   | 0.22    | 0.00003    | 24                  | 0.0              | 0.0000        | 23.8               | 1181.4                 |
| PRR7      | <i>bzip63-2</i> | LD        | 23.1                | 0.036     | 23.6   | 0.26    | 0.00057    | 24                  | 8.0              | 0.0000        | 7.7                | 290.6                  |
| bZIP63    | <i>cca1/lhy</i> | LD        | 24.6                | 0.027     | 22.7   | 0.11    | 0.03556    | 24                  | 24.0             | 0.0006        | 23.0               | <b>38.6</b> *          |

**Table S5 Continuation**

|        |                 |    |      |       |      |      |         |    |               |        |               |               |
|--------|-----------------|----|------|-------|------|------|---------|----|---------------|--------|---------------|---------------|
| GBS1   | <i>cca1/lhy</i> | LD | 23.8 | 0.021 | 23.0 | 0.23 | 0.00625 | 24 | <b>22.0 *</b> | 0.0002 | <b>20.6 *</b> | 5.2           |
| KMD4   | <i>cca1/lhy</i> | LD | 24.8 | 0.090 | --   | --   | 0.00070 | 24 | 2.0           | 0.0001 | 0.4           | 1.9           |
| BAM9   | <i>cca1/lhy</i> | LD | 25.6 | 0.029 | 24.5 | 0.22 | 0.03556 | 28 | 22.0          | 0.0003 | 21.6          | <b>73.5 *</b> |
| CCA1   | Ws              | LD | 25.4 | 0.058 | 25.5 | 0.21 | 0.00057 | 28 | 26.0          | 0.0000 | 24.7          | 991.2         |
| PRR7   | Ws              | LD | 23.0 | 0.014 | 23.5 | 0.23 | 0.00003 | 24 | 8.0           | 0.0000 | 7.7           | 333.5         |
| bZIP63 | Ws              | LD | 23.7 | 0.057 | --   | --   | 0.00001 | 24 | 2.0           | 0.0000 | 0.6           | 18.3          |
| GBS1   | Ws              | LD | 24.7 | 0.033 | 24.0 | 0.12 | 0.00112 | 24 | 0.0           | 0.0000 | 24.0          | 5.2           |
| KMD4   | Ws              | LD | 22.5 | 0.160 | --   | --   | 1       | 24 | 6.0           | 0.6725 | 6.0           | 0.6           |
| BAM9   | Ws              | LD | 24.5 | 0.048 | 13.8 | 0.06 | 0.00011 | 24 | 0.0           | 0.0000 | 23.8          | 44.0          |

<sup>1</sup> The circadian parameters period, phase (LAG) and amplitude were calculated using COSOPT and JTK Cycle to period, JTK Cycle and Meta Cycle to phase and amplitude. Numbers in bold style highlight bZIP63 and GBS circadian clock parameters in *cca1/lhy* double mutant and Ws or circadian clock and starch related genes in *bzip63-2* mutant.

\* Significant thresholds with pMMC-Beta < 0.05 or P.value < 0.05.

**Table S6** Circadian oscillator binding in downregulated genes in *bzip63-2* that are induced by KIN10 overexpression.

| AGI       | Name         | CCA1 binding | PRR5 binding | PRR7 binding | PRR9 binding | TOC1 binding |
|-----------|--------------|--------------|--------------|--------------|--------------|--------------|
| AT1G02660 | PLIP2        | -            | -            | -            | -            | -            |
| AT1G25400 | AT1G25400    | x            | x            | -            | -            | -            |
| AT1G54740 | DUF3049      | -            | x            | -            | -            | -            |
| AT1G62510 | AT1G62510    | -            | -            | -            | -            | -            |
| AT1G68440 | AT1G68440    | -            | x            | x            | x            | x            |
| AT1G69570 | AT1G69570    | x            | x            | x            | x            | -            |
| AT1G80920 | DNAJ8        | x            | x            | -            | -            | -            |
| AT2G17880 | DNAJ PC24    | -            | x            | -            | -            | -            |
| AT2G30600 | BTB/POZ      | x            | x            | -            | -            | -            |
| AT2G35170 | AT2G35170    | -            | -            | -            | -            | -            |
| AT3G02140 | TMAC2        | -            | x            | x            | -            | -            |
| AT3G07350 | AT3G07350    | -            | x            | x            | -            | -            |
| AT3G26510 | AT3G26510    | -            | x            | -            | -            | -            |
| AT3G29240 | DUF179       | -            | x            | -            | -            | -            |
| AT3G47340 | ASN1         | -            | -            | -            | -            | -            |
| AT3G47500 | CDF3         | -            | x            | x            | -            | -            |
| AT3G57020 | AT3G57020    | -            | x            | x            | -            | -            |
| AT3G59940 | KMD4         | x            | x            | x            | -            | -            |
| AT3G61890 | ATHB-12      | -            | x            | x            | x            | x            |
| AT4G03110 | BRUNO-LIKE 1 | -            | -            | -            | -            | -            |
| AT4G35770 | SEN1         | -            | -            | -            | -            | -            |
| AT4G37610 | BT5_BT B     | -            | x            | -            | -            | -            |
| AT5G05440 | PYL5         | x            | x            | x            | -            | x            |
| AT5G18670 | BAM9         | -            | x            | x            | x            | -            |
| AT5G20250 | DIN10        | x            | x            | x            | -            | -            |
| AT5G41080 | AT5G41080    | -            | x            | -            | -            | -            |
| AT5G49360 | BXL1         | -            | x            | -            | -            | -            |

x Bound; - Not bound; <sup>a</sup>Data from Nagel et al., 2015, PNAS; <sup>b</sup>Data from Liu et al., 2016, Plant Physiology.

## Supporting Information References

- Bertrand C, Benhamed M, Li YF, Ayadi M, Lemonnier G, Renou JP, Delarue M, Zhou DX. 2005.** *Arabidopsis* HAF2 gene encoding TATA-binding protein (TBP)-associated factor TAF1, is required to integrate light signals to regulate gene expression and growth. *Journal of Biological Chemistry* **280**: 1465–1473.
- Boyes DC, Zayed AM, Ascenzi R, McCaskill AJ, Hoffman NE, Davis KR, Görlach J. 2001.** Growth stage-based phenotypic analysis of *Arabidopsis*: A model for high throughput functional genomics in plants. *Plant Cell* **13**: 1499–1510.
- Fojtová M, Peška V, Dobšáková Z, Mozgová I, Fajkus J, Sýkorová E. 2011.** Molecular analysis of T-DNA insertion mutants identified putative regulatory elements in the *AtTERT* gene. *Journal of Experimental Botany* **62**: 5531–5545.
- Liu TL, Newton L, Liu M-JJ, Shiu S-HH, Farre EM, Farré EM. 2016.** A G-box-like motif is necessary for transcriptional regulation by circadian pseudo-response regulators in *Arabidopsis*. *Plant Physiology* **170**: 528–539.
- Matiolli CC, Tomaz JP, Duarte GT, Prado FM, del Bem LEV, Silveira AB, Gauer L, Corrêa LGG, Drumond RD, Viana AJ, et al. 2011.** The *Arabidopsis* bZIP gene *AtbZIP63* is a sensitive integrator of transient abscisic acid and glucose signals. *Plant Physiology* **157**.
- Mockler TC, Michael TP, Priest HD. 2007.** The Diurnal project : diurnal and circadian expression profiling , model-based pattern matching , and promoter analysis. *CSH Symposia LXXII*: 353–363.
- Nagel DH, Doherty CJ, Pruneda-Paz JL, Schmitz RJ, Ecker JR, Kay SA. 2015.** Genome-wide identification of CCA1 targets uncovers an expanded clock network in *Arabidopsis*. *Proceedings of the National Academy of Sciences of the United States of America* **112**: E4802–E4810.
- Tisné S, Serrand Y, Bach L, Gilbault E, Ben Ameer R, Balasse H, Voisin R, Bouchez D, Durand-Tardif M, Guerche P, et al. 2013.** Phenoscope: An automated large-scale phenotyping platform offering high spatial homogeneity. *Plant Journal* **74**: 534–544.
- Wang YY, Yang Y, Chen Q, Yu J, Hou Y, Han L, He J, Jiao D, Yu H. 2008.** Simultaneous knockdown of p18INK4C, p27Kip1 and MAD1 via RNA interference results in the expansion of long-term culture-initiating cells of murine bone marrow cells in vitro. *Acta Biochimica et Biophysica Sinica* **40**: 711–720.
- Xu XM, Rose A, Muthuswamy S, Jeong SY, Venkatakrisnan S, Zhao Q, Meier I. 2007.** NUCLEAR PORE ANCHOR, the *Arabidopsis* Homolog of Tpr/Mlp1/Mlp2/Megator, is involved in mrna export and sumo homeostasis and affects diverse aspects of plant development. *the Plant Cell Online* **19**: 1537–1548.
